# Supplementary material
Source: Springer Nature journal article supplement (https://www.springermedizin.de/resource/supplementary/12936_2010_1250_MOESM7_ESM.pdf/9549326)

**PvMSP-1<sub>19</sub>****PvAMA-1****Northern Tanna**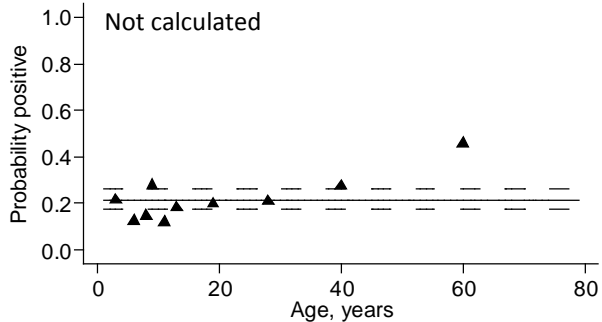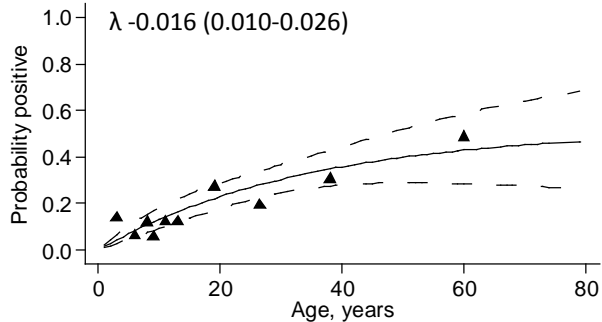**Northern Tanna Highlands**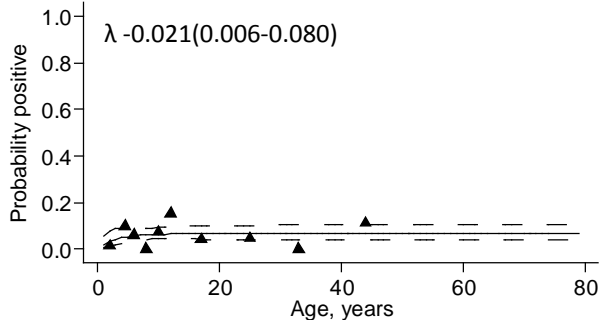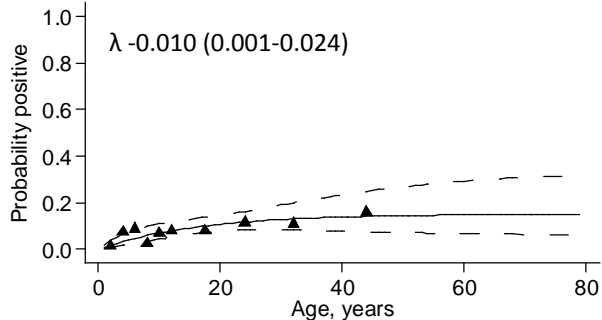**Southern Tanna**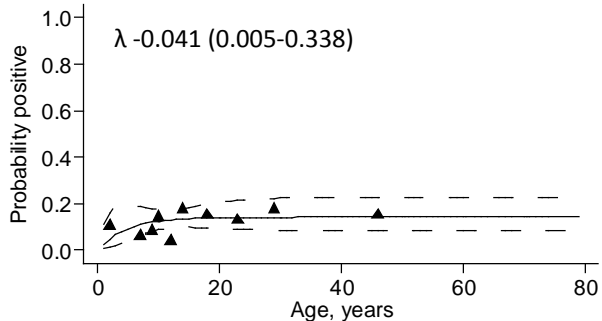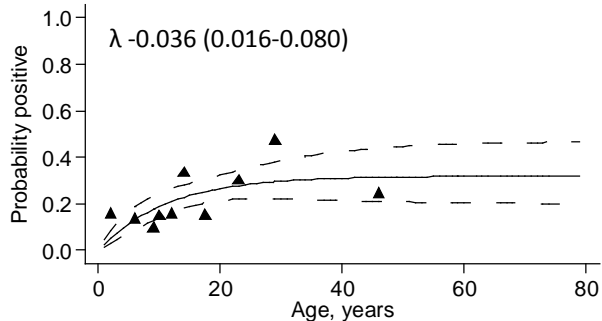**Aneityum**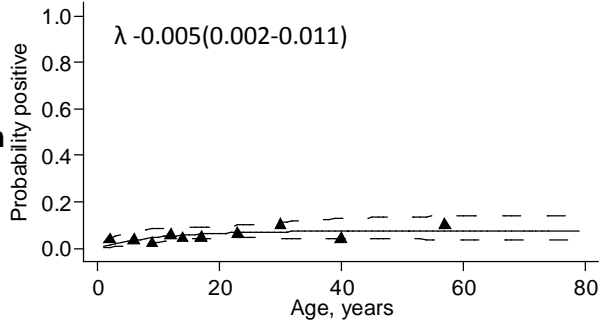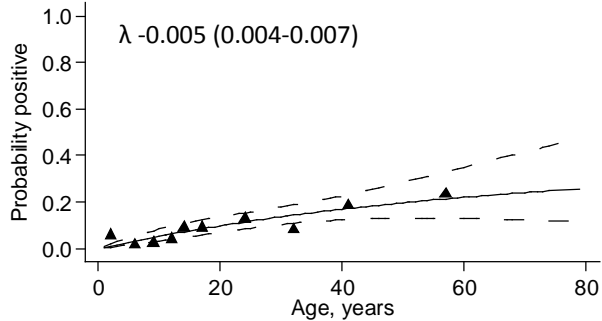

Supplement: MOESM7 [file 9549326]
